# Supplementary material
Source: publisher site journal article supplement (https://www.dovepress.com/article/340565)
Supplement: Supplementary file 1 [file get_supplementary_file.php]

**Table S1** The clinical features of high- and low- *BTG2* LUAD groups.

| Characteristic | Low expression of *BTG2* | High expression of *BTG2* |  |
| --- | --- | --- | --- |
| n | 116 | 352 |  |
| T stage, n (%) |  |  |  |
| T1 | 38(8.1%) | 133(28.4%) |  |
| T2 | 65(13.9%) | 180(38.5%) |  |
| T3 | 10(2.1%) | 26(5.6%) |  |
| T4 | 2(0.4%) | 11(2.4%) |  |
| TX | 1(0.2%) | 2(0.4%) |  |
| N stage, n (%) |  |  |  |
| N0 | 67 (14.3%) | 237(50.9%) |  |
| N1 | 29(6.2%) | 58(12.4%) |  |
| N2 | 18(3.8%) | 45(9.6%) |  |
| N3 | 1 (0.2%) | 1(0.2%) |  |
| NX | 1(0.2%) | 11(2.4%) |  |
| M stage, n (%) |  |  |  |
| M0 | 79(16.9%) | 218(46.6%) |  |
| M1 | 5 (1.1%) | 12(2.6%) |  |
| M1a | 0(0.0%) | 2(0.4%) |  |
| M1b | 0(0.0%) | 5(1.1%) |  |
| MX | 32(6.8%) | 115(24.6%) |  |
| Gender, n (%) |  |  |  |
| Female | 60(12.8%) | 200(42.7%) |  |
| Male | 56(12.0%) | 152(32.5%) |  |
| Age, n (%) |  |  |  |
| <65 | 62 (13.2%) | 151 (32.3%) |  |
| ≥65 | 54 (11.5%) | 140 (30.0%) |  |
| Smoker, n (%) |  |  |  |
| No | 18 (7.73.8%) | 53 (11.3%) |  |
| Yes | 98 (20.9%) | 299 (63.9%) |  |
| Stage, n (%) |  |  |  |
| I | 55(11.8%) | 199(42.5%) |  |
| II | 34(7.3%) | 79(16.9%) |  |
| III | 22(4.7%) | 48(10.3%) |  |
| IV | 5(1.1%) | 20(4.3%) |  |
| Targeted_molecular_therapy, n (%) |  |  |  |
| No | 73(15.6%) | 236(50.4%) |  |
| Yes | 43(9.2%) | 116(24.8%) |  |
| Radiation_therapy, n (%) |  |  |  |
| No | 94(20.1%) | 313(66.9%) |  |
| Yes | 22(4.7%) | 39(8.3%) |  |
| History_of_neoadjuvant  _treatment, n (%) |  |  |  |
| No | 114(24.4%) | 359(76.7%) |  |
| Yes | 2(0.4%) | 2(0.4%) |  |
